# Supplementary material for: Tracking Heme-Protein Interactions in Healthy and Pathological Human Serum in Native Conditions by Miniaturized FFF-Multidetection
Source: MDPI journal article supplement (doi:10.3390/app12136762), 2022-07-04
Supplement: s1 [file s1]

Archive with 1 entries (1 files):
- applsci-1769603-supplementary.pdf
